# Supplementary material for: Marine Heatwaves in the Mediterranean Sea: A Convolutional Neural Network study for extreme event prediction
Source: Copernicus journal article supplement (doi:10.5194/egusphere-2024-4003), 2025-01-09
Supplement: Supplementary file 1 [file egusphere-2024-4003-supplement.pdf]

# Marine Heatwaves in the Mediterranean Sea: A Convolutional Neural Network study for prediction of extreme events

Antonios Parasyris<sup>1</sup>, Vassiliki Metheniti<sup>1</sup>, Nikolaos Kampanis<sup>1</sup> and Sofia Darmaraki<sup>1</sup>

5

<sup>1</sup>*Foundation for Research and Technology-Hellas, Institute of Applied and Computational Mathematics, 70013 Heraklion, Greece*

\*Correspondence to: Antonios Parasyris ([antonisparasyris@gmail.com](mailto:antonisparasyris@gmail.com))

10

## Supplementary Material

**Table S1:** TPR and TNR for 3 and 7 day forecasts for the straight split ordering, calculated over the more recent test set (mid 2013-2017), compared to the same metrics using the opposite order split, retraining the models in more recent dataset and calculating the test set at earlier years of 1982 to mid-1985.

15

| Dataset order         | 3-day Forecast |              | 7-day forecast |               |
|-----------------------|----------------|--------------|----------------|---------------|
|                       | <b>TPR</b>     | <b>TNR</b>   | <b>TPR</b>     | <b>TNR</b>    |
| <b>Straight split</b> | <b>0.881</b>   | <b>0.891</b> | 0.7570         | 0.7921        |
| <b>Opposite split</b> | 0.7529         | 0.8423       | <b>0.8119</b>  | <b>0.8730</b> |
